# Supplementary material
Source: MDPI journal article supplement (https://www.mdpi.com/1424-8247/14/6/534)
Supplement: s1 [file s1]

Table S1. Medications and their daily doses taken by patients with bipolar depression; responder/non-responder status at 10-12 weeks is shown. NB the dose had been unchanged for at least 6 months before patients entered the study.

| Patients              | Medications and their daily doses at the baseline scan           |
|-----------------------|------------------------------------------------------------------|
|                       |                                                                  |
| <b>Responders</b>     |                                                                  |
| 1                     | Aripiprazole 10mg                                                |
| 2                     | Quetiapine 150mg                                                 |
| 3                     | Quetiapine 100mg<br>Fluoxetine 20mg                              |
| 4                     | Quetiapine 800mg<br>Lithium 1200mg                               |
| 5                     | Duloxetine 20mg<br>Lithium 600mg                                 |
| 6                     | Venlafaxine 75mg                                                 |
| 7                     | Venlafaxine 75mg                                                 |
| 8                     | Fluoxetine 20mg                                                  |
| 9                     | Citalopram 20mg                                                  |
| 10                    | None                                                             |
| 11                    | None                                                             |
| 12                    | None                                                             |
| 13                    | None                                                             |
| 14                    | None                                                             |
| 15                    | None                                                             |
|                       |                                                                  |
| <b>Non-responders</b> |                                                                  |
|                       |                                                                  |
| 16                    | Sertraline 200mg                                                 |
| 17                    | Quetiapine 500mg<br>Venlafaxine MR 75mg                          |
| 18                    | Lithium 1200mg                                                   |
| 19                    | Mirtazapine 30mg<br>Aripiprazole 20mg<br>Sodium valproate 1600mg |
| 20                    | None                                                             |
| 21                    | None                                                             |

Table S2. Correlations between established functional connectivity measures (parameter estimates) and clinical scores (% change baseline vs. post-treatment).

| Correlations           |                                                      |                         | HAMD     | BDI      | STAI     |
|------------------------|------------------------------------------------------|-------------------------|----------|----------|----------|
|                        |                                                      |                         | % change | % change | % change |
| <b>Pearson's<br/>r</b> | <b>DAN with<br/>left precuneus</b>                   | Correlation Coefficient | -0.704   | -0.529   | -0.151   |
|                        |                                                      | Sig. (2-tailed)         | 0.001    | 0.02     | 0.525    |
|                        |                                                      | N                       | 20       | 19       | 20       |
|                        | <b>Right FPN with<br/>left precuneus</b>             | Correlation Coefficient | -0.639   | -0.523   | -0.349   |
|                        |                                                      | Sig. (2-tailed)         | 0.002    | 0.022    | 0.132    |
|                        |                                                      | N                       | 20       | 19       | 20       |
|                        | <b>Left FPN with<br/>left ITG/fusiform/latOCC</b>    | Correlation Coefficient | -0.391   | -0.413   | -0.205   |
|                        |                                                      | Sig. (2-tailed)         | 0.089    | 0.079    | 0.386    |
|                        |                                                      | N                       | 20       | 19       | 20       |
|                        | <b>SSMN with<br/>left hippocampus<br/>/ amygdala</b> | Correlation Coefficient | -0.781   | -0.538   | -0.247   |
|                        |                                                      | Sig. (2-tailed)         | <0.001   | 0.018    | 0.294    |
|                        |                                                      | N                       | 20       | 19       | 20       |
|                        | <b>DMN with<br/>Left precuneus</b>                   | Correlation Coefficient | -0.616   | -0.425   | -0.37    |
|                        |                                                      | Sig. (2-tailed)         | 0.004    | 0.07     | 0.109    |
|                        |                                                      | N                       | 20       | 19       | 20       |
